# Supplementary material for: Inter and transgenerational impact of H3K4 methylation in neuronal homeostasis
Source: Life Sci Alliance. 2023 May 24;6(8):e202301970. doi: 10.26508/lsa.202301970 (PMC10209521; doi:10.26508/lsa.202301970)
Supplement: Supplementary file 1 [file LSA-2023-01970_TableS1.xlsx]

## Sheet: MUT-des-set-2(zr1208)
PVQ phenotype (%) in genotypically mutant descendants from N2 males crossed with set-2(zr1208); oyIs14
	F3	F4	F5	F6
#1	21%(11/52)	18%(9/50)	26%(13/50)	24%(12/50)
#2	14%(7/50)	18%(9/50)	24%(12/50)	20%(10/50)
#3	12%(6/50)	12(6/50)	26%(13/50)	20%(10/50)
#4	14%(7/50)	18%(9/50)	28%(14/50)	20%(10/50)
#5	20%(10/50)	20%(10/50)	34%(17/50)	26%(13/50)
#6	4%(2/50)	20%(10/50)	24%(12/50)	20%(10/50)
#7	12%(6/50)	20%(10/50)	20%(10/50)	16%(8/50)
#8	10%(5/50)	10%(5/50)	16%(8/50)	16%(8/50)
#9	14%(7/50)	14%(7/50)	16%(8/50)	20%(10/50)
#10	10%(5/50)	18%(9/50)	10%(5/50)	32%(16/50)
	Penetrance of the PVQ phenotype is expressed in % (defective animals/total animals)
		Red indicates p value < 0.05 using Chi-square test, comparing wild type not crossed (6%)(12/200)

## Sheet: WT-des-set-2(zr1208)
PVQ phenotype in genotypically wild type descendants from N2 males crossed with set-2(zr1208);oyIs14
	F3	F4	F5
#1	23%(12/52)	10%(5/52)	6%(3/52)
#2	22%(11/50)	12%(6/50)	6%(3/50)
#3	15%(8/52)	13%(7/52)	10%(5/50)
#4	8%(4/51)	n.d
#5	6%(3/50)
#6	8%(4/52)
#7	16%(8/50)	6%(3/50)
#8	8%(4/52)
#9	16%(8/50)	8%(4/50)
#10	8%(4/52)
#11	15%(8/52)
#12	12%(6/50)
#13	16%(8/50)	17%(9/52)	8%(4/50)
#14	2%(1/50)	4%(2/50)
#15	13%(7/52)	13%(7/52)
#16	18%(9/51)	10%(5/52)	10%(5/50)
#17	4%(2/50)
#18	6%(3/52)
#19	0%(0/51)
#20	2%(1/51)
#21	6%(3/52)
#22	4%(2/50)	7%(52)
#23	4%(2/51)
#24	4%(2/50)
#25	10%(5/51)
#26	10%(5/50)
#27	10%(5/52)
#28	8%(4/50)
#29	20%(10/50)	14%(7/51)	10%(5/51)
#30	6%(3/52)
#31	2%(1/50)
#32	10%(5/50)
#33	4%(2/50)
#34	4%(2/51)
#35	10%(5/52)
#36	4%(2/50)
#37	14%(7/50)
#38	4%(2/51)
#39	12%(6/52)
#40	14%(7/51)
	Penetrance of the PVQ phenotype is expressed in % (defective animals/total animals)
		Red indicates p value < 0.05 using Chi-square test, comparing wild type not crossed (6%)(12/200)

## Sheet: WT-des-set-2(zr2012)
PVQ phenotype in genotypically wild type descendants from N2 males crossed with set-2(zr2012);oyIs14
	F3	F4	F5
#1	10%(5/50)	8%(4/51)
#2	4%(2/52)
#3	8%(4/50)
#4	8%(4/50)
#5	25%(13/52)	Line was lost to sterility
#6	8%(4/50)
#7	4%(2/50)
#8	8%(4/50)
#9	4%(2/51)
#10	8%(4/50)
#11	18%(9/50)	6%(3/50)
#12	4%(2/50)
#13	2%(1/52)
#14	23%(12/52)	8%(4/52)
#15	4%(2/52)
#16	19%(10/52)	8%(4/51)
#17	25%(13/52)	12%(6/50)
#18	2%(1/51)
#19	6%(3/50)
#20	12%(6/51)
#21	17%(9/52)	20%(10/50)	13%(7/52)
#22	6%(3/50)
#23	13%(7/52)
#24	4%(2/50)
#25	4%(/252)
#26	2%(1/51)
#27	6%(3/52)
#28	6%(3/50)
#29	6%(3/52)
#30	4%(2/51)
#31	22%(11/50)	16%(8/50)	6%(3/50)
#32	6%(3/52)
#33	4%(2/50)	8%(4/50)	2%(1/50)
#34	4%(2/51)
#35	6%(3/50)
#36	8%(4/50)
#37	10%(5/50)
#38	13%(7/52)
	Penetrance of the PVQ phenotype is expressed in % (defective animals/total animals)
		Red indicates p value < 0.05 using Chi-square test, comparing wild type not crossed (6%)(12/200)

## Sheet: WT-des-ash-2
PVQ phenotype in genotypically wild type descendants from N2 males crossed with ash-2(tm1905); oyIs14
	F3	F4	F5	F6
#1	28%(14/50)	18%(9/51)	18%(9/50)	6%(3/50)
#2	0%(0/50)
#3	13%(7/52)
#4	6%(3/50)
#5	17%(9/52)	20%(10/50)	14%(7/50)
#6	6%(3/52)
#7	6%(3/50)
#8	14%(7/50)
#9	10%(5/50)
#10	14%(7/50)
#11	4%(2/50)
#12	6%(3/51)
#13	6%(3/50)
#14	8%(4/51)
#15	16%(8/50)	6%(3/50)
#16	2%(1/50)
#17	13%(7/52)
#18	2%(1/50)
#19	20%(10/50)	10%(5/51)
#20	2%(1/50)
#21	2%(1/50)
#22	4%(2/52)
#23	4%(2/52)
#24	6%(3/50)
#25	12%(6/51)
#26	4%(2/50)
#27	12%(6/50)
#28	10%(5/50)
#29	22%(11/50)	18%(9/50)	10%(5/50)
#30	6%(3/50)
#31	10%(5/50)
#32	14%(7/50)
#33	4%(2/50)
	Penetrance of the PVQ phenotype is expressed in % (defective animals/total animals)
		Red indicates p value < 0.05 using Chi-square test, comparing wild type not crossed (6%)(12/200)

## Sheet: WT-ctrl
PVQ phenotype in genotypically wild type descendants from N2 males crossed with oyIs14
	F3
#1	6%(3/50)
#2	4%(2/51)
#3	8%(4/52)
#4	2%(1/52)
#5	10%(5/50)
#6	6%(3/50)
#7	6%(3/52)
#8	6%(3/50)
#9	8%(4/51)
#10	10%(5/51)
#11	8%(4/50)
#12	8%(4/52)
#13	8%(4/50)
#14	2%(1/50)
#15	0%(0/50)
#16	12%(6/50)
#17	4%(2/50)
#18	6%(3/50)
#19	6%(3/50)
#20	10%(5/50)
#21	13%(7/52)
#22	8%(4/52)
#23	10%(5/50)
#24	8%(4/51)
#25	2%(1/50)
#26	4%(2/51)
#27	6%(3/50)
#28	13%(7/52)
#29	8%(4/50)
#30	4%(2/52)
#31	8%(4/51)
#32	4%(2/52)
#33	2%(1/50)
#34	6%(3/50)
#35	2%(1/50)
#36	10%(5/50)
#37	6%(3/51)
#38	8%(4/50)
	Penetrance of the PVQ phenotype is expressed in % (defective animals/total animals)
		Red indicates p value < 0.05 using Chi-square test, comparing wild type not crossed (6%)(12/200)

## Sheet: WT-des-unc-6
PVQ phenotype in genotypically wild type descendants from N2 males crossed with unc-6(ev400); oyIs14
	F3
#1	4%(2/50)
#2	10%(5/52)
#3	10%(5/52)
#4	10%(5/50)
#5	12%(6/50)
#6	13%(7/52)
#7	4%(2/50)
#8	10%(5/50)
#9	8%(4/50)
#10	0%(0/50)
#11	12%(6/50)
#12	13%(7/52)
#13	10%(5/52)
#14	8%(4/50)
#15	12%(6/50)
#16	13%(7/52)
#17	10%(5/50)
#18	10%(5/51)
#19	2%(1/50)
#20	4%(2/51)
#21	10%(5/51)
#22	6%(3/52)
#23	2%(1/50)
#24	6%(3/51)
#25	4%(2/52)
#26	10%(5/52)
	Penetrance of the PVQ phenotype is expressed in % (defective animals/total animals)
		Red indicates p value < 0.05 using Chi-square test, comparing wild type not crossed (6%)(12/200)

## Sheet: WT-des-set-2;hrde-1
PVQ phenotype in genotypically wild type descendants from N2 males crossed with set-2(zr1208) hrde-1(tm1200); oyIs14
	F3	F4
#1	22%(11/50)	14%(7/50)
#2	18%(9/50)	14%(7/50)
#3	18%(9/50)	14%(7/50)
#4	18%(9/50)	12%(6/50)
#5	18%(9/50)	10%(5/50)
#6	16%(8/50)	8%(4/50)
#7	16%(8/50)	8%(4/50)
#8	16%(8/50)	6%(3/50)
#9	14%(7/50)
#10	14%(7/50)
#11	14%(7/50)
#12	12%(6/50)
#13	12%(6/50)
#14	12%(6/50)
#15	12%(6/50)
#16	12%(6/50)
#17	12%(6/50)
#18	12%(6/50)
#19	10%(5/50)
#20	10%(5/50)
#21	10%(5/50)
#22	10%(5/50)
#23	10%(5/50)
#24	10%(5/50)
#25	10%(5/50)
#26	8%(4/50)
#27	8%(4/50)
#28	8%(4/50)
#29	8%(4/50)
#30	8%(4/50)
#31	8%(4/50)
#32	8%(4/50)
#33	6%(3/50)
#34	6%(3/50)
#35	6%(3/50)
#36	6%(3/50)
#37	6%(3/50)
#38	6%(3/50)
#39	6%(3/50)
#40	2%(1/50)
	Penetrance of the PVQ phenotype is expressed in % (defective animals/total animals)
		Red indicates p value < 0.05 using Chi-square test, comparing wild type not crossed (6%)(12/200)

## Sheet: WT-des-set-2(zr1208)herma
PVQ phenotype in genotypically wild type descendants from set-2(zr1208); oyIs14 males crossed with N2
	F3	F4
#1	6%(3/50)
#2	12%(6/50)
#3	6%(3/50)
#4	4%(2/52)
#5	6%(3/50)
#6	10%(5/50)
#7	6%(3/50)
#8	2%(1/50)
#9	14%(7/50)
#10	2%(1/50)
#11	8%(4/50)
#12	18 % (50)	8%(4/50)
#13	6%(3/50)
#14	4%(2/50)
#15	4%(2/50)
#16	2%(1/50)
#17	8%(4/50)
#18	6%(3/50)
#19	8%(4/50)
#20	8%(4/50)
#21	8%(4/50)
#22	6%(3/50)
#23	2%(1/50)
#24	8%(4/50)
#25	4%(2/50)
#26	12%(6/50)
#27	6%(3/52)
#28	6%(3/50)
#29	18 % (50)	10%(5/50)
#30	4%(2/50)
#31	10%(5/50)
#32	10%(5/50)
#33	2%(1/50)
#34	2%(1/50)
#35	4%(2/50)
#36	4%(2/50)
#37	4%(2/50)
#38	0%(0/50)
	Penetrance of the PVQ phenotype is expressed in % (defective animals/total animals)
		Red indicates p value < 0.05 using Chi-square test, comparing wild type not crossed (6%)(12/200)
